RESEARCH ARTICLE

# Self-managed physical activity in breast cancer survivors: A scoping review

Maria Chiara Bò<sup>1,2</sup>, Andrea Merlo<sup>1,2\*</sup>, Maria Bernadette Ligabue<sup>3</sup>, Maria Chiara Bassi<sup>4</sup>, Mirco Lusuardi<sup>5</sup>, Isabella Campanini<sup>1</sup>

**1** LAM—Motion Analysis Laboratory, Neuromotor and Rehabilitation Department, Azienda USL-IRCCS di Reggio Emilia, San Sebastiano Hospital, Correggio (Reggio Emilia), Italy, **2** Merlo Bioengineering, Parma, Italy, **3** Motor Rehabilitation Unit, Neuromotor and Rehabilitation Department, Azienda USL-IRCCS di Reggio Emilia, San Sebastiano Hospital, Correggio (Reggio Emilia), Italy, **4** Medical Library, Azienda USL-IRCCS di Reggio Emilia, Correggio (Reggio Emilia), Italy, **5** Neuromotor and Rehabilitation Department, Azienda USL-IRCCS Reggio Emilia, Correggio (Reggio Emilia), Italy

\* [andrea.merlo@ausl.re.it](mailto:andrea.merlo@ausl.re.it)

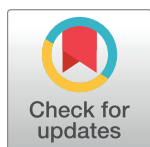

## Abstract

### Objective

Breast cancer survivors (BCS) experience many issues of rehabilitative concern due to the treatments they have undergone. Given the chronicity of these outcomes, the increasing number of survivors, and the positive results obtained by supervised exercise, professionals should consider offering self-managed physical activity (PA) programs to this population. Our aim was to map the currently available evidence about self-care rehabilitation for BCS.

### Methods

Medline, CINAHL, and Cochrane databases were searched for primary literature. Scoping review methodological frameworks were used to tackle the heterogeneity of the topic. Studies investigating self-managed PA interventions prescribed to adult BCS were included.

### Results

One hundred-eight studies were included, with sample sizes ranging from 6 to 692 patients. Information was systematically collected in tables displaying study design, type of PA, duration and recommended frequency, professional leading the study, type of supervision, initial training, strategies used to help patients integrate self-care into their daily lives, and self-managed PA efficacy. Tables were produced for every oncological side effect that BCS might experience: lymphedema, arthralgia, cancer-related fatigue, a decline in physical parameters, treatment-related cardiotoxicity, peripheral neurotoxicity, and a possible decline in the quality of life.

### Conclusions

Self-managed PA has the potential to improve BCS oncological issues. Professionals can adopt many strategies to support patients and empower them with long-lasting self-care competencies. This scoping review provided a comprehensive and easy-to-consult

## OPEN ACCESS

**Citation:** Bò MC, Merlo A, Ligabue MB, Bassi MC, Lusuardi M, Campanini I (2023) Self-managed physical activity in breast cancer survivors: A scoping review. PLoS ONE 18(4): e0284807. <https://doi.org/10.1371/journal.pone.0284807>

**Editor:** Malgorzata Wojcik, Pozan University of Physical Education, POLAND

**Received:** December 12, 2022

**Accepted:** April 1, 2023

**Published:** April 24, 2023

**Copyright:** © 2023 Bò et al. This is an open access article distributed under the terms of the [Creative Commons Attribution License](https://creativecommons.org/licenses/by/4.0/), which permits unrestricted use, distribution, and reproduction in any medium, provided the original author and source are credited.

**Data Availability Statement:** All relevant data are within the paper and its [Supporting Information](#) files.

**Funding:** This study was partially supported by Italian Ministry of Health – Ricerca Corrente Annual Program 2023. There was no additional external funding received for this study. The funders had no role in study design, data collection and analysis, decision to publish, or preparation of the manuscript.

**Competing interests:** Authors have no conflicts of interest to disclose, and have not personal or

financial relationship with other people or organizations.

**Abbreviations:** BCS, Breast Cancer Survivors; CRF, Cancer-Related Fatigue; PA, Physical Activity; QoL, Quality of Life; RCT, Randomized Controlled Trial; VO<sub>2</sub>, peak Oxygen uptake; 6MWT, 6-Minute Walking Test.

overview of self-managed PA interventions for BCS. We also provided recommendations for future primary studies and secondary synthesis.

## Introduction

Cancer has one of the highest incidences among diseases in developed countries. Breast cancer especially, is the leading female cancer, representing 15% of all new tumor diagnosis every year [1].

As of 2016, preventive screening programs and increasingly precise therapies have led to enormous progress in terms of survival rates for approximately 90% of women, five years after being diagnosed [1]. However, breast cancer survivors (BCS) experience a range of long-term physical problems caused by the disease itself and, very frequently, by the therapies they have received [2]. The main consequences are upper limb lymphedema following lymph node dissection (total or partial—sentinel lymph node only) and/or radiotherapy, arthralgia caused by aromatase inhibitors, cancer-related fatigue (CRF), reduced bone mineral density, decline of muscle and body structure, cardiotoxicity, and peripheral neurotoxicity [2]. Consequently, these issues affect patients' quality of life (QoL), starting a dangerous vicious cycle between the above outcomes and participation in social, work, and family contexts [3].

Given the chronicity of most oncological outcomes even years after treatment, interventions to reduce or control their development are necessary. Several strategies in current literature are described as being effective in controlling oncological symptoms, including physical exercise, psychological techniques such as cognitive behavioral therapy, pharmacological interventions, or nutritional therapies [2]. Within a multi-disciplinary and patient-centered rehabilitative approach, the intervention of a physiotherapist or, more generally, of an exercise expert plays a fundamental role for the well-being and recovery of the patient [4].

Standard physiotherapy and physical activity (PA) programs offered to BCS often take place while their therapies are still in progress but usually have a limited duration in time, ending upon discharge from the hospital inpatient regime or shortly thereafter [5]. In the long run survivors are left to fend for themselves, without proper training in order to have a real impact in their lifestyles [5]. In fact, less than 30% of BCS have an adequate level of weekly PA, and some studies report that more than 80% of them have not been properly educated about the benefits of exercise during, or after their treatment [6].

This practice is at odds with the Chronic Care Model designed by Wagner in 1998 [7] and later updated by Barr and colleagues in 2003 [8], in which the concept of self-care support was one of the main points. Thanks to this practice, patients were progressively guided towards learning how to manage their health, promote self-empowerment, and become capable of continuing their care independently in the long term, thus preventing symptom relapse [7]. Literature is promoting rehabilitation programs where patients with chronic diseases become semi-autonomous in the management of their symptoms by simply continuing the activities previously acquired from their healthcare professionals, and recent systematic reviews support the referral to Wagner's model for organizing these projects [9]. Moreover, additional elements can hinder these long-lasting supervised programs, such as financial issues, the distance travelled to and from the facilities, and the availability of caregivers to accompany BCS during their treatments [10]. These elements further support the need for integrated self-managed rehabilitation programs after cancer therapies. Since different cancer outcomes affect women in several personal spheres, in this study we have focused not only on assessing each single outcome but also on investigating how the latter impacts women's QoL and social participation

from a biopsychosocial perspective as described by the International Classification of Functioning, Disability and Health [11, 12].

Since the topic of self-managed PAs for BCS is extensive and it has never been studied jointly, a scoping review seemed the way forward to investigate it. Scoping reviews are a way to examine and map existing literature on a wide-ranging topic, even when available evidence is still limited or is still in the initial stages, and to highlight the knowledge gaps that need to be filled [13, 14]. Unlike systematic reviews, scoping reviews do not mean to establish the efficacy of a treatment or to produce a critically appraised and synthesized answer to a specific question [15].

We conducted a scoping review to map available literature on how self-managed PA is delivered and how it affects oncological outcomes in BCS.

## Methods

We followed the guidelines specific for scoping reviews [13], which are the extension of the PRISMA guidelines for systematic reviews [16]. The methodological process includes six stages, outlined below.

### Stage 1: Identifying the research question

The leading questions of our investigation were: I) Which types of self-managed PAs are used in literature to treat cancer-related outcomes in BCS? II) How are they administered, and what is the frequency and the dosage proposed to counteract the symptoms? III) What effects are obtained on outcome? IV) What strategies are used to help patients embrace self-care in their daily routine?

### Stage 2: Identifying relevant studies

Systematic searches were designed, refined, and conducted between February 2021 and April 2022. No time limitations were set, and the following databases were investigated: Medline, CINAHL, and Cochrane. Only articles published in English were taken into consideration.

Keywords searched included “tumor”, “malignancy”, “cancer survivors”, “self-care”, “self-cure”, “self-management”, “physical therapy modalities”, “rehabilitation”, “physiotherapy”, “exercise”, and “home-based care”. Medical Subjects Headings (MeSH) were used, when available, to ensure consistency of the search terms (full search strategies can be found in Table 1).

**Table 1. Search strategies.**

| Database                 | Strategy                                                                                                                                                                                                                                                                                                                                                                                                                                                           |
|--------------------------|--------------------------------------------------------------------------------------------------------------------------------------------------------------------------------------------------------------------------------------------------------------------------------------------------------------------------------------------------------------------------------------------------------------------------------------------------------------------|
| <b>MEDLINE (PubMed)</b>  | ("Breast Neoplasms"[Mesh] OR breast cancer OR breast carcinoma OR mammary cancer OR breast tumor OR breast tumour OR breast neoplasm) AND ("Self Care"[Mesh] OR self cure OR self care OR self management OR home-based OR unsupervised) AND ("Physical Therapy Modalities"[Mesh] OR rehabilitation OR physical therap* OR physiotherapy OR exercise* OR physical activity)                                                                                        |
| <b>Cochrane Database</b> | (MeSH descriptor: [Breast Neoplasms] explode all trees OR breast cancer OR breast carcinoma OR mammary cancer OR breast tumor OR breast tumour OR breast neoplasm) AND (MeSH descriptor: [Self Care] explode all trees OR self cure OR self care OR self management OR home-based OR unsupervised) AND (MeSH descriptor: [Physical Therapy Modalities] explode all trees OR rehabilitation OR physical therap* OR physiotherapy OR exercise* OR physical activity) |
| <b>Cinahl Database</b>   | (MH "Breast Neoplasms" OR breast cancer OR breast carcinoma OR mammary cancer OR breast tumor OR breast tumour OR breast neoplasm) AND (MH "Self Care" OR self cure OR self care OR self management OR home-based OR unsupervised) AND (MH "Physical Therapy" OR rehabilitation OR physical therap* OR physiotherapy OR exercise* OR physical activity)                                                                                                            |

<https://doi.org/10.1371/journal.pone.0284807.t001>

Additional papers not intercepted by the search string were added later by handsearching the reference lists of the identified studies.

### Stage 3: Selecting studies

Two reviewers (MCBO and AM) screened all articles and assessed them according to the eligibility criteria. As clarified by the scoping review guidelines [13, 14, 16], no quality appraisal of the included studies was performed. Any discrepancy was solved by involving a third reviewer (IC). If the full text was not available, authors were contacted via email, and the studies were excluded only if authors did not reply. The eligibility criteria are presented following the PICO framework:

**Types of studies.** We included primary quantitative literature as experimental or observational studies that involved self-managed PA after a specific prescription. Initial recommendations by a professional were necessary for the inclusion. Study designs such as protocols, intervention development, case-control, or qualitative studies, and secondary literature such as reviews and meta-analysis were excluded. We also excluded literature in which full text was not available, since these could not provide enough details about the variables we investigated. Finally, studies that were just pilot studies of trials already included were also discarded, as running the risk of overestimating the results.

**Population.** Adult BCS were the population of interest for this review. We included BCS who had at least started their cancer therapies and were at any stage of the disease that implied a potential need for recovery from long-term outcomes affecting women. We excluded BCS whose cancer stage required only palliative interventions. Studies involving minors or adults recovering from pediatric tumors were excluded.

**Intervention.** We considered self-managed any PA program that initially started under clinical prescription and later were performed autonomously. Patients could be supervised and trained by a professional in the initial stages, then the program had to involve at least a one-month self-managed activity before evaluating the patient again at the follow-up. During the self-care phase, professionals could offer in-person support meetings to increase patient motivation or go over the exercise, but these could not exceed a frequency of less than a fortnight. No frequency limits were set for remote support, such as phone calls or texting. Interventions could involve multidisciplinary approaches, combining PA as the primary intervention along with diet or psychological therapies.

**Comparison.** Since we included both single-arm and multiple-arm trials, the interventions could be compared with any type of control.

**Outcome.** Outcome measures had to be related with the long-term issues experienced by BCS: lymphedema, arthralgia, CRF, reduced bone mineral density, decline of muscle and body structure, cardiotoxicity, and peripheral neurotoxicity. We also included outcome measures for patient's QoL.

**Context.** No limitations were set regarding the context of the studies.

### Stage 4: Charting the data

Relevant data were extracted from each study and grouped in tables. When in doubt we reviewed changes in the table headings to increase accuracy.

### Stage 5: Summarizing and reporting the data

Information on the included control groups, type of self-care PA, recommended frequency, duration of interventions, and the professional leading the program were extracted from each included study and summarized in appropriate tables. Details of the strategies used by

researchers to guide BCS toward autonomy were also collected: supervision at the beginning of treatment and techniques of ongoing support during self-care were categorized and collected in another table. A narrative synthesis of the most relevant topics was provided as well. Further characteristics of each study are available in the [S1 Table](#).

## Stage 6: Consultation

One of the authors (MBL), expert in the field of oncological Physical and Rehabilitation Medicine, was consulted during the whole review process to help us set inclusion criteria and to identify important literature we could have inadvertently missed. Findings were discussed again at the end of the writing, to increase accuracy on key points.

## Results

The literature search led to 3,376 records. We screened the titles and abstracts for a total of 2,702 non-duplicate studies, and we excluded 2,522 according to the eligibility criteria, mainly because of inappropriate study designs or the lack of focus on BCS. One hundred-eighty studies were selected for full-text screening and 102 were finally included. Five additional studies were retrieved by handsearching, leading to a total of 107 studies. However, one study described two separate different trials [17] and was therefore considered twice, leading to 108 included studies. [Fig 1](#) summarizes the flow of the search process corresponding to PRISMA guidelines for scoping reviews [13, 16]. Details about each individual study are available in the [S1 Table](#).

Out of the 108 studies, 64% (69/108) were randomized controlled trials (RCT) with two/three/four arms; 7% (8/108) were pilot studies; 24% (26/108) had a single-arm design, and 5% (5/108) had other study designs. Eighty-two studies compared the self-care intervention to at least one control group, as illustrated in [Table 2](#). Included samples among studies ranged from 6 to 692 BCS.

Details of the self-care PA prescribed to BCS are presented in [Table 3](#). These mainly involved aerobic exercise alone, combined exercise programs (including aerobic, resistance,

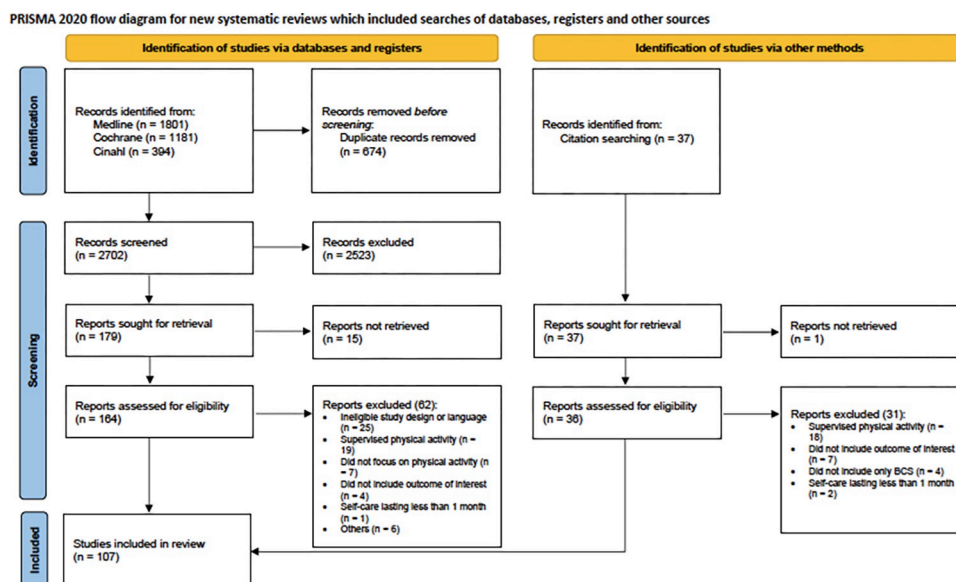

**Fig 1. Flow chart of the search conducted.**

<https://doi.org/10.1371/journal.pone.0284807.g001>

**Table 2. Intervention delivered or activity performed by the control group in the studies included in this review.**

| Type of control group                                  | Number of studies |
|--------------------------------------------------------|-------------------|
| <i>Two-arm studies (n = 77)</i>                        |                   |
| Active control group                                   | 12                |
| Similar activity with supervision                      | 5                 |
| Diet                                                   | 3                 |
| Educational/psychological control group                | 2                 |
| Usual care                                             | 55                |
| <i>Three/four-arm studies (n = 5)</i>                  |                   |
| Active control group and usual care                    | 3                 |
| Educational/psychological control group and usual care | 1                 |
| Similar activity with supervision and usual care       | 1                 |
| <i>Without control group (n = 26)</i>                  |                   |

<https://doi.org/10.1371/journal.pone.0284807.t002>

flexibility, and balance exercises), and multidimensional programs (combining PA with nutritional or psychological interventions). Complex decongestive therapy and upper limb exercises were specific interventions for treating lymphedema. Finally, a minority of studies offered BCS mind-body practices such as Yoga, Tai Chi, or Qigong, or the performance of resistance

**Table 3. Characteristics of self-managed interventions, reported in terms of type of activity, duration, recommended frequency, and professional managing the program.**

| Characteristics of the interventions                                     | Number of interventions (n = 108) |
|--------------------------------------------------------------------------|-----------------------------------|
| <i>Type of activity</i>                                                  |                                   |
| Aerobic exercise program                                                 | 39                                |
| Resistance exercise program                                              | 6                                 |
| Combined exercise program (aerobic, resistance, stretching, flexibility) | 25                                |
| Mind-body practice (Yoga, Tai Chi, Qigong)                               | 11                                |
| Multidimensional program (physical, nutritional, psychological)          | 12                                |
| Complex decongestive therapy                                             | 12                                |
| Upper limb exercise program                                              | 3                                 |
| <i>Duration</i>                                                          |                                   |
| 1–2 months                                                               | 30                                |
| 3–5 months                                                               | 31                                |
| 6–11 months                                                              | 32                                |
| ≥ 1 year                                                                 | 15                                |
| <i>Frequency</i>                                                         |                                   |
| 1–2 times / week                                                         | 11                                |
| ≥ 3 times / week                                                         | 57                                |
| Daily                                                                    | 22                                |
| Not indicated                                                            | 18                                |
| <i>Responsible professional</i>                                          |                                   |
| Exercise expert                                                          | 25                                |
| Physiotherapist                                                          | 21                                |
| Multidisciplinary team                                                   | 12                                |
| Nurse                                                                    | 11                                |
| Mind-body teacher                                                        | 8                                 |
| Others                                                                   | 2                                 |
| Not specified                                                            | 29                                |

<https://doi.org/10.1371/journal.pone.0284807.t003>

**Table 4. Supervision provided and strategies adopted to promote self-care behaviors in breast cancer survivors' routine.**

| Intervention                                 | Number of studies (n = 108) |
|----------------------------------------------|-----------------------------|
| <i>Initial supervision</i>                   |                             |
| Single initial consultation                  | 40                          |
| Frequent contacts during the initial period  | 3                           |
| Intensive training during the initial period | 43                          |
| Not delivered                                | 22                          |
| <i>Strategies adopted during self-care</i>   |                             |
| Periodic calls or texting                    | 46                          |
| Regular meetings                             | 16                          |
| Sporadic supervised sessions                 | 1                           |
| Educational support                          | 3                           |
| None                                         | 42                          |

<https://doi.org/10.1371/journal.pone.0284807.t004>

exercises only. The duration of the studies was varied considerably, ranging from 1–2 months to over a year in a few cases. A more homogeneous consensus surrounded the recommended frequency: 73% (79/108) suggested PA at least three times a week, or even daily, and only 10% (11/108) suggested a lesser frequency. On the other hand, 17% (18/108) of the studies did not specify how frequently a patient should exercise.

Regarding the person in charge of the intervention, the most frequent professional involved in the self-management of BCS were exercise experts and physiotherapists. Eleven percent (12/108) of the studies involved a multidisciplinary team, with at least two different professionals working together.

Regarding the strategies used by professionals to help patients integrate self-care activities and behaviors into their daily lives, we differentiated between interventions delivered at the beginning of the program targeting autonomy and those adopted during the entire self-care period (see Table 4). A large proportion of researchers—around 40% (43/108)—took advantage of an initial period of supervision (from ten days to one year), including the hospitalization period, to properly train and monitor patients. Other studies provided a single consultation with a practical demonstration during the first meeting. During the self-care phase, most of the studies verified the patient's self-care status via phone calls or texting, while 16% (17/108) were scheduled meetings with the professionals or sporadic supervised sessions to revise the program jointly. However, 20% (22/108) did not provide any initial training and 39% (42/108) did not provide any ongoing support.

The following paragraphs summarize the main outcome measures and efficacy results as reported by the included studies, separating each outcome BCS could experience after an oncological therapy. We recommend caution when interpreting these results, as this scoping review only provides a descriptive synthesis, without statistical analysis.

## Lymphedema

Twenty-seven studies explored the efficacy of self-care PA in reducing lymphedema [18–44].

The main measures employed to evaluate lymphedema were the computation of interlimb volume differences (as measured by volume, tape circumference calculation, or perometry) and bio-impedance spectroscopy. Additional measures implemented to get a complete view of the arm status were the measurement of shoulder range of motion and of pain assessment. Two out of eleven RCTs reported self-care to be effective in reducing lymphedema in BCS compared to usual care, especially when complex decongestive therapy was performed. In

three out of eleven RCTs lymphedema was reduced when compared to baseline values, however, self-care was comparable to the activities performed by the control groups.

### Arthralgia

Only three studies recorded the effects of self-care PA on arthralgia and one of them was an RCT [45–47].

Outcome measures used specific scales for joint pain, as the Arthritis Impact Measurement Scale and the Western Ontario and McMaster University Osteoarthritis Index. In the long run, significant differences pertaining to the arthralgia domain were found for all three studies, nonetheless, no study demonstrated the superiority of self-care over usual care.

### Cancer-related fatigue

Fifty studies explored the efficacy of self-care PA in reducing CRF in BCS [46, 48–96].

About 15 different scales have been used across studies to measure the perception of CRF and its impact on patients' daily life. Among these, the Functional Assessment of Cancer Therapy–Fatigue and the Piper Fatigue Scale were mostly employed. Researchers then often combined functional tests to assess patients' fatigue such as the 6-Minute Walking Test (6MWT) or peak oxygen uptake (VO<sub>2</sub>) computation. Thirty-nine percent (15/38) of the RCTs claimed self-managed PA to be effective in reducing fatigue compared to other activities. Other seven RCTs found improvements in CRF in the long run, even though it did not record between-group differences. At the end of the interventions, the sixteen remaining RCTs did not register any changes in the symptoms.

### Physical parameters

A total of 37 studies investigated the efficacy of self-care PA in controlling body composition and loss of bone or muscle tissues [18, 24, 38, 45, 52, 54, 55, 65, 68, 69, 71, 76, 81, 83, 86, 90, 96–115].

The body mass index was the main measure for assessing body composition, with particular focus on lean and fat mass. Bone mineral density was usually computed by dual-energy X-ray absorptiometry. Muscle strength was evaluated with functional tests depending on the muscles analyzed, as with a dynamometer or by maximum repetition number. Results on effectiveness were heterogeneous among RCTs: 4/17 found self-care to be effective in controlling weight gain and body mass index compared to control groups; 0/6 reported significant results on bone mineral density when comparing the interventions and control groups, and 5/14 registered an increase in muscle strength, enough to be statistically different when compared to that of the control group.

### Cardiotoxicity

Cardiotoxicity leads to reduced cardiac function and potential fatal adverse events. The effects of self-care PA can be indirectly calculated by assessing cardiovascular fitness. A total of 20 studies evaluated this parameter [38, 52, 54, 55, 65, 68, 69, 81, 83, 85, 86, 92, 95, 97, 101, 106, 108, 110, 111, 116].

The main measures used to assess cardiovascular fitness were the VO<sub>2</sub> computation, the distance covered during the 6MWT, and the heart rate under stress conditions. Four out of 14 RCTs found greater positive effects on cardiovascular fitness at the end of the self-managed programs compared to control groups. Seven further RCTs registered significant improvements in VO<sub>2</sub> Maximum Test over time but not in the between groups.

## Peripheral neurotoxicity

Two studies investigated the efficacy of self-care PA in controlling neuropathic symptoms in BCS and one of them was an RCT [117, 118].

Both used specific validated scales: the Neuropathic Pain Scale for Postsurgical Patients and the Leeds Assessment of Neuropathic Symptoms and Signs. Both studies recorded significant differences compared with pre-interventions values.

## Quality of life

Fifty-five studies also investigated changes in QoL following self-care PA programs [17, 20, 25, 26, 30, 32, 33, 39, 41, 44, 45, 47–49, 52–55, 61–63, 65, 66, 69, 77, 81–83, 86, 90–95, 98, 100–103, 105, 106, 108, 111, 113–116, 118–124]. The outcome measures mostly used were the European Organization for the Research and Treatment of Cancer Quality of Life Questionnaire, the Functional Assessment of Cancer Therapy–Breast, and the Short Form Health Survey 36. Twenty-five percent (9/36) of the RCTs recorded significant changes in QoL after self-care compared to the control groups' activities. Forty-four percent (16/36) of studies recorded improvements over time and the remaining thirty-one percent (11/36) found self-care to be ineffective in regaining QoL.

A summary of the results of the RCTs with respect to the initial supervision delivered and the strategies employed to help patients embrace self-care is provided in Table 5. When a study evaluated more than one outcome, this was considered multiple times.

## Discussion

In oncology, the topic of self-care is an increasingly heartfelt topic, as demonstrated by the high number of studies published in the last decade. Cancer survivors experience a wide range of issues starting with the diagnosis and continuing even several years after the end of a treatment [2, 125]. In the long term these patients could benefit from new ways of managing their symptoms so as not to be dependent on health professionals. To the best of our knowledge, this is the first study mapping available literature on self-managed PA used to control long-term issues experienced by BCS.

Our review included both BCS patients still undergoing adjuvant therapies and those who had already finished cancer treatments. The goals set for these samples were different: for the former, the target of rehabilitation was to prevent and contain the onset of symptoms; for the latter, it was to reduce them. In line with the scoping review's aims, we did not mean to draw efficacy results. Therefore, this heterogeneity does not produce a bias in our results. On the contrary, we considered it a positive sign that several authors suggested a self-managed PA program when active cancer treatments were still in place, reflecting a stepwise approach needed for this population. In fact, although the purpose of PA changes according to the various stages of treatment, a step-by-step educational support can be implemented from the very beginning. This will undoubtedly help BCS to adopt and maintain a healthier lifestyle in the years to come.

Among the 108 studies that met the inclusion criteria for this scoping review, we found many different types of programs for self-managed PA (see Table 3). Most of the programs delivered involved aerobic exercise or several activities combined—e.g., a mix of aerobic, resistance, flexibility, and balance exercises. New multidimensional approaches—e.g., including mind-body practices—are also on the rise, as seen in 21% (23/108) of our findings. The availability of such a broad selection of self-care activities that can be selected and combined in tailor-made programs, could encourage treatment adherence, and possibly determine long-lasting results [126–128].

Table 5. Treatment efficacy (count), considering only RCTs.

| Study results                                       | Results counting |
|-----------------------------------------------------|------------------|
| <b>Initial supervision</b>                          |                  |
| <i>Single initial consultation</i>                  |                  |
| Effective treatment <sup>*,†</sup>                  | 11               |
| Effective treatment <sup>†</sup>                    | 18               |
| Ineffective treatment                               | 14               |
| <i>Frequent contacts during the initial period</i>  |                  |
| Effective treatment <sup>*,†</sup>                  | 1                |
| Effective treatment <sup>†</sup>                    | 1                |
| <i>Intensive training during the initial period</i> |                  |
| Effective treatment <sup>*,†</sup>                  | 15               |
| Effective treatment <sup>†</sup>                    | 19               |
| Ineffective treatment                               | 23               |
| <i>Not delivered</i>                                |                  |
| Effective treatment <sup>*,†</sup>                  | 9                |
| Effective treatment <sup>†</sup>                    | 6                |
| Ineffective treatment                               | 9                |
| <b>Strategy to increase adherence</b>               |                  |
| <i>Periodic calls or texting</i>                    |                  |
| Effective treatment <sup>*,†</sup>                  | 20               |
| Effective treatment <sup>†</sup>                    | 20               |
| Ineffective treatment                               | 17               |
| <i>Educational or support groups</i>                |                  |
| Effective treatment <sup>*,†</sup>                  | 1                |
| Ineffective treatment                               | 3                |
| <i>Regular visits</i>                               |                  |
| Effective treatment <sup>*,†</sup>                  | 6                |
| Effective treatment <sup>†</sup>                    | 11               |
| Ineffective treatment                               | 7                |
| <i>Sporadic supervised sessions</i>                 |                  |
| Effective treatment <sup>*,†</sup>                  | 1                |
| Effective treatment <sup>†</sup>                    | 1                |
| <i>None</i>                                         |                  |
| Effective treatment <sup>*,†</sup>                  | 8                |
| Effective treatment <sup>†</sup>                    | 12               |
| Ineffective treatment                               | 19               |

\* Statistically significant between-groups difference (compared to the control group): the effect of smPA is greater than that of the control treatment

† statistically significant within-group difference in the intervention group (compared to baseline values): the effect of smPA is equal to that of the control treatment. a Frequent contact during the initial period included studies where authors repeatedly checked for patients' adherence and comfort after the prescribed exercises via weekly in-person meetings, phone calls and emails. b Intensive training during the initial period involved studies in which authors provided a supervised period at the beginning of the program in order to educate patients and improve their long-term adherence. Note: each study was considered for each variable analyzed

<https://doi.org/10.1371/journal.pone.0284807.t005>

In this review, treatment dosage was considered in terms of both duration of the self-managed activity and its recommended frequency. The duration of these programs varied somewhat among studies, ranging from 1 to 24 months (see Table 3). On the one hand, this lack of

unanimity might depend on the complexity and the differences among oncological issues. On the other hand, the very short intervention duration (1 month) selected in some studies could have been chosen to ensure study feasibility. Future studies ought to investigate what the minimum duration is, in order to achieve clinically meaningful results, along with the ensuing long-term side effects. Furthermore, when reporting the results of new trials, authors should explain the reasons underlying the length of the intervention period chosen.

Almost all studies agreed on relatively frequent PA throughout the week, mainly suggesting self-care practices at least three times per week. This is in line with PA guidelines for cancer survivors that recommend 150 min/week of aerobic exercise and 2–3 weekly sessions of resistance activity [129–131]. Moreover, it is consistent with the need to create a continuum in the care that becomes part of the patients' daily routine [7]. It is worth mentioning that as many as 18 included studies did not specify with which frequency BCS should be practicing. Since this limitation prevents the replicability of the studies, and does not allow to properly analyze their results in systematic reviews, the information on the recommended amount of weekly activity should always be reported in future studies.

Several healthcare professionals prescribed self-care programs. This appeared to be a relevant element for an in-depth analysis of the interventions. We therefore decided to include it among the variables retrieved from each study (see the [S1 Table](#)). As many as nine different professionals, both from healthcare and other non-scientific backgrounds, oversaw the PA programs, as shown in [Table 3](#). In our opinion, this variability among professionals highlights the possibility of creating multidisciplinary teams supporting women, favoring a gradual transition from the hospitalization phase to that of a home routine [132–137]. Health professionals can easily handle BCS during the post-surgical acute phase and the follow-ups, while different professionals could follow patients during daily long-term management, in a suitable environment (support group activities, psychological and nutritional support groups, adapted PA groups, mind-body activities performed in gyms and sport facilities), according to individual needs and preferences and with no further burden to the national health systems.

Different levels of self-care were the main focus of this review: from complete patient autonomy to hybrid conditions in which strategies of ongoing patient support were used. In most studies, more complex interventions included strengthening exercises, mind-body techniques—e.g., Yoga—as well as self-managed lymphatic drainage and bandaging that could be more complex to put into practice independently. In the remaining studies, aerobic exercise consisted of simply reaching a set amount of weekly walking and was self-managed. This difference justifies the initial presence and supervision by professionals, as stated in most of the included studies (see [Table 3](#)). Here, the practitioner, not only checked that the exercises were being carried out correctly and corrected the patients, even adapting the program as they went along, but also acted as a bridge to gradually prepare the patients to the importance of independent PA. This is in line with the Chronic Care Model [7]. After the initial training period, contact with professionals during the self-care phase, albeit sporadic follow-ups, was to help patients not feel abandoned once their therapies were over, developing self-empowerment and self-efficacy. Moreover, literature specific to the BCS population reports that women may be at risk of neglecting their health because of the burden related to the family management [128]. A periodic reminder about the importance of ongoing self-care could help them re-establish their priorities, set short-term achievable goals, and stay active in the years to come.

In addition to this continuous support during the chronic stage of the disease, a new field of oncological rehabilitation pertaining to pre-habilitation is gaining ground—i.e., promoting health-optimizing behavior soon after the diagnosis so as to mitigate the unwanted consequences of future cancer treatments [138]. Cancer diagnosis has been proven to be a teaching experience that results in health and behavioral changes [139]. For this reason, pre-habilitation

could further support BCS in a gradual understanding of the importance of self-care in the years to come. Since no study addressing this topic was found for BCS, future studies should explore this opportunity further.

## Implications for the future

In line with the aim of this scoping review, we have mapped the recommendations for self-care through physical activity available in literature. We also collected the outcomes used in literature to assess several health issues that women might experience (see the [S1 Table](#)). These can be used by researchers when designing new trials. The ratio of effective and non-effective treatments reported in [Table 5](#) is a mere descriptive analysis of the results in literature. A statistically-based synthesis to determine whether a treatment is effective goes beyond the aim of this scoping review—i.e., a meta-analysis would be appropriate, where effect size is computed and weighted based on sample sizes and average. In this paper we intentionally did not perform a quantitative meta-analysis synthesis: a systematic review would have required summarizing all the information in a single effectiveness index. This would have led to the loss of the specific characteristics of each individual study—e.g., considering aerobic exercise on par with yoga, or programs involving an initial supervised period on par with those self-managed from the very beginning—to favor concise and homogeneous results. Moreover, the heterogeneity of our included studies in terms of stages of breast cancer, type of intervention, and outcome measure would have prevented us from performing a single large meta-analysis. The current scoping review provides a detailed overview on the topic by identifying areas of interest and the confounding factors that future clinical trials and meta-analyses should consider. For future systematic reviews, we suggest a careful selection of the studies by identifying smaller homogeneous subgroups with similar parameters—e.g., similar treatments, comparable levels of self-care support and follow-up, grouping samples according to the cancer stages—to obtain more accurate recommendations when choosing the best self-managed interventions.

Regarding future new clinical studies, we recommend that authors state clearly all treatment variables as shown in [Tables 3 and 4](#)—e.g., weekly frequency, professional in charge, strategies used to help patients move towards autonomy—as these could constitute factors influencing treatment efficacy. Most of the studies available in literature compared self-care interventions with usual care groups, and women only received “How To” instructions mainly with pamphlets (see [Table 2](#)). Comparing self-care programs to similar supervised programs would undoubtedly be beneficial for future research, given the already widely demonstrated effectiveness of the latter [[3](#), [4](#), [126](#), [140](#), [141](#)]. Knowing whether the same results can be obtained both independently and with constant supervision might help clinicians design tailored treatments according to the needs and circumstances of each individual patient—e.g., distance from the hospital.

When considering future systematic reviews, we suggest conducting a synthesis of the effectiveness of the interventions by investigating: 1) which type of self-managed PA is more effective based on each outcome; 2) the minimal duration to have a positive effect, and 3) whether the choice of initial training and ongoing support from professionals promotes better outcomes compared to complete self-care. Once this is established, this would allow national health systems to set up evidence-based and detailed self-care programs for BCS in an effort to reduce re-hospitalizations and new medical interventions due to exacerbation of symptoms that have not been adequately controlled [[142](#)]. Monitoring health care spending and simultaneously improving patients' lives are the goals to strive for in this new era of chronic cancer management.

Finally, health professionals can also benefit from this review during their daily clinical practice. Indeed, clinicians may need to look up the best solutions and guidelines when dealing

with BCS and their multifaceted long-term issues and, unfortunately, they are not always familiar with database research. In this scoping review, professionals can immediately find a comprehensive and user-friendly summary of the available literature on self-managed PA programs.

## Strengths and limitations

This is the first scoping review that maps existing primary literature on self-managed PA programs for BCS in terms of types of exercise, duration, frequency, professionals, and addressed health issues. The main strengths of our study are a robust search string developed with a specialist from our Institution (MCBA) who researched the main databases. Both entirely self-managed programs, and programs that included strategies for patient guidance and support were included. Moreover, we considered eligible both traditional PA such as aerobic and resistance exercise, and new types of practices such as Yoga, Tai Chi, Qigong, or multidimensional programs. This allowed for a broader and more comprehensive study of available evidence.

The main limitation of the current review is the risk of not having retrieved all the studies on self-care. This could be due to the novelty in this cancer rehabilitation field since some studies might not yet be labeled correctly in the databases. To reduce these odds, we performed a thorough hand-search starting from the bibliography of the studies found with the electronic search. In addition, this review did not cover all types of self-care for BCS, but only those that involved PA as the primary intervention. Programs primarily based on psychological or nutritional interventions were not included and should be considered in separate reviews, given the very different rationale of the treatments. Finally, with our team's experience and with help from experts in the field we were able to highlight the main issues common to cancer therapies. However, we may have skipped some important domains. Pain, for example, is a relevant side effect that BCS experience. We chose to consider it as a complex multifactorial condition integrated within other issues, such as lymphedema, arthralgia, and neurotoxicity (as can be seen in the [S1 Table](#)), and to therefore not analyze it as a separate domain.

## Conclusions

BCS experience several health issues following cancer therapies and may benefit from different types of physical activity in order to manage them. We have mapped the evidence surrounding exercise-based interventions when these are self-managed by women after being prescribed by a doctor. Professionals working with BCS have several strategies at their disposal to support patients by empowering them with long-lasting self-care skills. Recommendations for clinical studies and systematic reviews were provided, along with suggestions about the grey areas still to cover and develop.

## Supporting information

**S1 Checklist. PRISMA checklist.**  
(DOCX)

**S1 Table. List of all studies included in the scoping review and their main characteristics.** \* statistically significant between-groups difference (compared to the control group): the effect of self-managed PA is greater than that of the control treatment; † statistically significant within-group difference in the intervention group (compared to baseline values): the effect of self-managed PA is equal to that of the control treatment.  
(DOCX)

## Acknowledgments

The authors thank Dr. Tiziano Innocenti for his precious suggestions.

## Author Contributions

**Conceptualization:** Maria Bernadette Ligabue, Isabella Campanini.

**Data curation:** Maria Chiara Bò, Andrea Merlo, Maria Chiara Bassi, Isabella Campanini.

**Formal analysis:** Maria Chiara Bò, Andrea Merlo, Isabella Campanini.

**Methodology:** Andrea Merlo, Maria Chiara Bassi, Isabella Campanini.

**Supervision:** Andrea Merlo, Isabella Campanini.

**Writing – original draft:** Maria Chiara Bò, Andrea Merlo, Isabella Campanini.

**Writing – review & editing:** Maria Chiara Bò, Andrea Merlo, Maria Bernadette Ligabue, Maria Chiara Bassi, Mirco Lusuardi, Isabella Campanini.

## References

1. National Cancer Institute. Cancer Stat Facts: Female Breast Cancer. 2021. Available: <https://seer.cancer.gov/statfacts/html/breast.html>
2. Tralongo P, Carnio S, Giusti R, Pescarenico MG, Caraceni A, Pace A, et al. Linee guida Lungoviventi. Linee guida AIOM. 2018; 1–61.
3. Mishra SI, Scherer RW, Geigle PM, Berlanstein DR, Topaloglu O, Gotay CC, et al. Exercise interventions on health-related quality of life for cancer survivors. Cochrane Database of Systematic Reviews. 2012; 18: 9. <https://doi.org/10.1002/14651858.CD007566.pub2> PMID: 22895961
4. Cramp F, Byron-Daniel J. Exercise for the management of cancer-related fatigue in adults (Review). Cochrane Database of Systematic Reviews. 2012; 2012. <https://doi.org/10.1002/14651858.CD006145.pub3> PMID: 23152233
5. Damstra RJ, Halk AB, Dutch Working Group on Lymphedema. The Dutch lymphedema guidelines based on the International Classification of Functioning, Disability, and Health and the chronic care model. J Vasc Surg Venous Lymphat Disord. 2017; 5: 756–765. <https://doi.org/10.1016/j.jvsv.2017.04.012> PMID: 28818234
6. Smith-Turchyn J, Richardson J, Tozer R, McNeely M, Thabane L. Bridging the gap: incorporating exercise evidence into clinical practice in breast cancer care. Supportive Care in Cancer. 2020; 28: 897–905. <https://doi.org/10.1007/s00520-019-04897-9> PMID: 31168711
7. Wagner EH, Austin BT, Davis C, Hindmarsh M, Schaefer J, Bonomi A. Improving chronic illness care: Translating evidence into action. Health Aff. 2001; 20: 64–78. <https://doi.org/10.1377/hlthaff.20.6.64> PMID: 11816692
8. Barr VJ, Robinson S, Marin-link B, Underhill L, Dotts A, Ravensdale D, et al. The Expanded Chronic Care Model. Hosp Q. 2003; 7: 73–82.
9. Davy C, Bleasel J, Liu H, Tchan M, Ponniah S, Brown A. Effectiveness of chronic care models: Opportunities for improving healthcare practice and health outcomes: A systematic review. BMC Health Serv Res. 2015; 15: 1–11. <https://doi.org/10.1186/s12913-015-0854-8> PMID: 25958128
10. Miedema B, Easley J. Barriers to rehabilitative care for young breast cancer survivors: A qualitative understanding. Supportive Care in Cancer. 2012; 20: 1193–1201. <https://doi.org/10.1007/s00520-011-1196-7> PMID: 21625913
11. Ridner SH. The psycho-social impact of lymphedema. Lymphat Res Biol. 2009; 7: 109–12. <https://doi.org/10.1089/lrb.2009.0004> PMID: 19534633
12. World Health Organization. International classification of functioning, disability and health (ICF). Available: <https://www.who.int/standards/classifications/international-classification-of-functioning-disability-and-health>
13. Tricco AC, Lillie E, Zarin W, O'Brien KK, Colquhoun H, Levac D, et al. PRISMA extension for scoping reviews (PRISMA-ScR): Checklist and explanation. Ann Intern Med. 2018; 169: 467–473. <https://doi.org/10.7326/M18-0850> PMID: 30178033

14. Peters MDJ, Godfrey CM, McInerney P, Munn Z, Tricco AC, Khalil H. Chapter 11: Scoping reviews. In: Aromataris E, Munn Z, editors. *JBIR Reviewer's Manual*. Joanna Briggs Institute Reviewer's Manual, JBI, 2020; 2020. pp. 407–452.
15. Munn Z, Peters MDJ, Stern C, Tufanaru C, McArthur A, Aromataris E. Systematic review or scoping review? Guidance for authors when choosing between a systematic or scoping review approach. *BMC Med Res Methodol*. 2018; 18: 143. <https://doi.org/10.1186/s12874-018-0611-x> PMID: 30453902
16. Page MJ, McKenzie JE, Bossuyt PM, Boutron I, Hoffmann TC, Mulrow CD, et al. The PRISMA 2020 statement: An updated guideline for reporting systematic reviews. *The BMJ*. 2021; 372. <https://doi.org/10.1136/bmj.n71> PMID: 33782057
17. Cadmus LA, Salovey P, Yu H, Chung G, Kasl S, Irwin ML. Exercise and quality of life during and after treatment for breast cancer: results of two randomized controlled trials. *Psychooncology*. 2009; 18: 343–352. <https://doi.org/10.1002/pon.1525> PMID: 19242918
18. Ammitzbøll G, Johansen C, Lanng C, Andersen EW, Kroman N, Zerahn B, et al. Progressive resistance training to prevent arm lymphedema in the first year after breast cancer surgery: Results of a randomized controlled trial. *Cancer*. 2019; 125: 1683–1692. <https://doi.org/10.1002/cncr.31962> PMID: 30633334
19. Andersen L, Hojris I, Erlandsen M, Andersen J. Treatment of breast-cancer-related lymphedema with or without manual lymphatic drainage: A randomized study. *Acta Oncol (Madr)*. 2000; 39: 399–405. <https://doi.org/10.1080/028418600750013186> PMID: 10987238
20. Arinaga Y, Piller N, Sato F, Ishida T, Ohtake T, Kikuchi K, et al. The 10-min holistic self-care for patients with breast cancer-related lymphedema: Pilot randomized controlled study. *Tohoku Journal of Experimental Medicine*. 2019; 247: 139–147. <https://doi.org/10.1620/tjem.247.139> PMID: 30799328
21. Brown JC, Kumar A, Cheville AL, Tchou JC, Troxel AB, Harris SR, et al. Association between lymphedema self-care adherence and lymphedema outcomes among women with breast cancer-related lymphedema. *Am J Phys Med Rehabil*. 2015; 94: 288–296. <https://doi.org/10.1097/PHM.000000000000178> PMID: 25171662
22. Cansız G, Arkan Dönmez A, Kapucu S, Borman P. The effect of a self-management lymphedema education program on lymphedema, lymphedema-related symptoms, patient compliance, daily living activities and patient activation in patients with breast cancer-related lymphedema: A quasi-experimental study. *European Journal of Oncology Nursing*. 2022; 56. <https://doi.org/10.1016/j.ejon.2021.102081> PMID: 34875398
23. Cinar N, Seckin Ü, Keskin D, Bodur H, Bozkurt B, Cengiz Ö. The Effectiveness of Early Rehabilitation in Patients With Modified Radical Mastectomy. *Cancer Nurs*. 2008; 31: 160–165. <https://doi.org/10.1097/01.NCC.0000305696.12873.0e> PMID: 18490892
24. Fu MR, Axelrod D, Guth AA, Cartwright F, Qiu Z, Goldberg JD, et al. Proactive Approach to Lymphedema Risk Reduction: A Prospective Study. *Ann Surg Oncol*. 2014; 21: 3481–3489. <https://doi.org/10.1245/s10434-014-3761-z> PMID: 24809302
25. Gautam AP, Maiya AG, Vidyasagar MS. Effect of home-based exercise program on lymphedema and quality of life in female postmastectomy patients: Pre-post intervention study. *J Rehabil Res Dev*. 2011; 48: 1261–1268. <https://doi.org/10.1682/jrrd.2010.05.0089> PMID: 22234669
26. Gençay Can A, Ekşioğlu E, Çakıcı FA. Early Detection and Treatment of Subclinical Lymphedema in Patients with Breast Cancer. *Lymphat Res Biol*. 2019; 17: 368–373. <https://doi.org/10.1089/lrb.2018.0033> PMID: 30543479
27. Jeffs E, Wiseman T. Randomised controlled trial to determine the benefit of daily home-based exercise in addition to self-care in the management of breast cancer-related lymphoedema: A feasibility study. *Supportive Care in Cancer*. 2013; 21: 1013–1023. <https://doi.org/10.1007/s00520-012-1621-6> PMID: 23073712
28. Johansson K, Klernäs P, Weibull A, Mattsson S. A home-based weight lifting program for patients with arm lymphedema following breast cancer treatment: A pilot and feasibility study. *Lymphology*. 2014; 47: 51–64. PMID: 25282871
29. Johansson K, Hayes S, Speck RM, Schmitz KH. Water-based exercise for patients with chronic arm lymphedema: A randomized controlled pilot trial. *Am J Phys Med Rehabil*. 2013; 92: 312–319. <https://doi.org/10.1097/PHM.0b013e318278b0e8> PMID: 23370582
30. Letellier ME, Towers A, Shimony A, Tidhar D. Breast cancer-related lymphedema: a randomized controlled pilot and feasibility study. *American journal of physical medicine & rehabilitation / Association of Academic Physiatrists*. 2014; 93: 751–763. <https://doi.org/10.1097/PHM.0000000000000089> PMID: 24743455
31. Ligabue MB, Campanini I, Veroni P, Cepelli A, Lusuardi M, Merlo A. Efficacy of self-administered complex decongestive therapy on breast cancer-related lymphedema: a single-blind randomized

- controlled trial. *Breast Cancer Res Treat.* 2019; 175: 191–201. <https://doi.org/10.1007/s10549-019-05136-9> PMID: 30712198
32. Loudon A, Barnett T, Piller N, Immink MA, Williams AD. Yoga management of breast cancer-related lymphoedema: A randomised controlled pilot-trial. *BMC Complement Altern Med.* 2014; 14: 1–13. <https://doi.org/10.1186/1472-6882-14-214> PMID: 24980836
  33. Mirolo BR, Bunce IH, Chapman M, Olsen T, Eliadis P, Hennessy JM, et al. Psychosocial benefits of postmastectomy lymphedema therapy. *Cancer Nurs.* 1995; 18: 197–205. Available: <http://www.ncbi.nlm.nih.gov/pubmed/7600551> PMID: 7600551
  34. Moattari M, Jaafari B, Talei A, Piroozi S, Tahmasebi S, Zakeri Z. The effect of combined decongestive therapy and pneumatic compression pump on lymphedema indicators in patients with breast cancer related lymphedema. *Iran Red Crescent Med J.* 2012; 14: 210–7. <https://doi.org/10.1016/j.ijrobp.2011.05.043> PMID: 22754683
  35. Paskett ED, Le-Rademacher J, Oliveri JM, Liu H, Seisler DK, Sloan JA, et al. A randomized study to prevent lymphedema in women treated for breast cancer: CALGB 70305 (Alliance). *Cancer.* 2021; 127: 291–299. <https://doi.org/10.1002/cncr.33183> PMID: 33079411
  36. Randheer S, Kadambari D, Srinivasan K, Bhuvanewari V, Bhanumathy M, Salaja R. Comprehensive decongestive therapy in postmastectomy lymphedema: An Indian perspective. *Indian J Cancer.* 2011; 48: 397–402. <https://doi.org/10.4103/0019-509X.92250> PMID: 22293250
  37. Schmitz KH, Ahmed RL, Troxel AB, Cheville A, Lewis-Grant L, Smith R, et al. Weight lifting for women at risk for breast cancer-related lymphedema: A randomized trial. *JAMA—Journal of the American Medical Association.* 2010; 304: 2699–2705. <https://doi.org/10.1001/jama.2010.1837> PMID: 21148134
  38. Schmitz KH, Troxel AB, Dean LT, Demichele A, Brown JC, Sturgeon K, et al. Effect of home-based exercise and weight loss programs on breast cancer-related lymphedema outcomes among overweight breast cancer survivors: the WISER survivor randomized clinical trial. *JAMA Oncol.* 2019; 5: 1605–1613. <https://doi.org/10.1001/jamaoncol.2019.2109> PMID: 31415063
  39. Temur K, Kapucu S. The effectiveness of lymphedema self-management in the prevention of breast cancer-related lymphedema and quality of life: A randomized controlled trial. *European Journal of Oncology Nursing.* 2019; 40: 22–35. <https://doi.org/10.1016/j.ejon.2019.02.006> PMID: 31229204
  40. Vignes S, Porcher R, Arrault M, Dupuy A. Long-term management of breast cancer-related lymphedema after intensive decongestive physiotherapy. *Breast Cancer Res Treat.* 2007; 101: 285–290. <https://doi.org/10.1007/s10549-006-9297-6> PMID: 16826318
  41. Harder H, Langridge C, Solis-Trapala I, Zammit C, Grant M, Rees D, et al. Post-operative exercises after breast cancer surgery: Results of a RCT evaluating standard care versus standard care plus additional yoga exercise. *Eur J Integr Med.* 2015; 7: 202–210. <https://doi.org/10.1016/j.eujim.2015.02.002>
  42. Liu F, Li F, Fu MR, Zhao Q, Wang Y, Pang D, et al. Self-management Strategies for Risk Reduction of Subclinical and Mild Stage of Breast Cancer-Related Lymphedema: A Longitudinal, Quasi-experimental Study. *Cancer Nurs.* 2021; 44: E493–E502. <https://doi.org/10.1097/NCC.0000000000000919> PMID: 34694088
  43. Noura S, Kiani F, Moulaei N, Tasbandi M, Ebrahimi Tabas E. Effect of Self-care Training on Upper Limb Function and Pain After Breast Cancer Surgery. *Medical—Surgical Nursing Journal.* 2021; 10. <https://doi.org/10.5812/msnj.121095>
  44. Todd J, Scally A, Dodwell D, Horgan K, Topping A. A randomised controlled trial of two programmes of shoulder exercise following axillary node dissection for invasive breast cancer. *Physiotherapy.* 2008; 94: 265–273. <https://doi.org/10.1016/j.physio.2008.09.005>
  45. Denyschen CA, Burton H, Ademuyiwa F, Levine E, Tetewsky S, O'Connor T. Exercise intervention in breast cancer patients with aromatase inhibitor-associated arthralgia: A pilot study. *Eur J Cancer Care (Engl).* 2014; 23: 493–501. <https://doi.org/10.1111/ecc.12155> PMID: 24289215
  46. Nyrop KA, Callahan LF, Cleveland RJ, Arbeeve LL, Hackney BS, Muss HB. Randomized Controlled Trial of a Home-Based Walking Program to Reduce Moderate to Severe Aromatase Inhibitor-Associated Arthralgia in Breast Cancer Survivors. *Oncologist.* 2017; 22: 1238–1249. <https://doi.org/10.1634/theoncologist.2017-0174> PMID: 28698390
  47. Fields J, Richardson A, Hopkinson J, Fenlon D. Nordic Walking as an Exercise Intervention to Reduce Pain in Women With Aromatase Inhibitor-Associated Arthralgia: A Feasibility Study. *J Pain Symptom Manage.* 2016; 52: 548–559. <https://doi.org/10.1016/j.jpainsymman.2016.03.010> PMID: 27265816
  48. Baruth M, Wilcox S, Der Ananian C, Heiney S. Effects of Home-Based Walking on Quality of Life and Fatigue Outcomes in Early Stage Breast Cancer Survivors: A 12-Week Pilot Study. *J Phys Act Health.* 2015; 12: S110–S118. <https://doi.org/10.1123/jpah.2012-0339> PMID: 23963636

49. Baumann FT, Bieck O, Oberste M, Kuhn R, Schmitt J, Wentrock S, et al. Sustainable impact of an individualized exercise program on physical activity level and fatigue syndrome on breast cancer patients in two German rehabilitation centers. *Supportive Care in Cancer*. 2017; 25: 1047–1054. <https://doi.org/10.1007/s00520-016-3490-x> PMID: 27942857
50. Carter SJ, Hunter GR, McAuley E, Courneya KS, Anton PM, Rogers LQ. Lower rate-pressure product during submaximal walking: a link to fatigue improvement following a physical activity intervention among breast cancer survivors. *Journal of Cancer Survivorship*. 2016; 10: 927–934. <https://doi.org/10.1007/s11764-016-0539-2> PMID: 27061740
51. Chaoul A, Milbury K, Spelman A, Basen-Engquist K, Hall MH, Wei Q, et al. Randomized trial of Tibetan yoga in patients with breast cancer undergoing chemotherapy. *Cancer*. 2018; 124: 36–45. <https://doi.org/10.1002/cncr.30938> PMID: 28940301
52. Cornette T, Vincent F, Mandigout S, Antonini MT, Leobon S, Labrunie A, et al. Effects of home-based exercise training on VO<sub>2</sub> in breast cancer patients under adjuvant or neoadjuvant chemotherapy (SAPA): A randomized controlled trial. *Eur J Phys Rehabil Med*. 2016; 52: 223–232. PMID: 25986222
53. Damush TM, Perkins A, Miller K. The implementation of an oncologist referred, exercise self-management program for older breast cancer survivors. *Psychooncology*. 2006; 15: 884–890. <https://doi.org/10.1002/pon.1020> PMID: 16378317
54. Delrieu L, Pialoux V, Pérol O, Morelle M, Martin A, Friedenreich C, et al. Feasibility and health benefits of an individualized physical activity intervention in women with metastatic breast cancer: Intervention study. *JMIR Mhealth Uhealth*. 2020; 8. <https://doi.org/10.2196/12306> PMID: 32012082
55. Dieli-Conwright CM, Courneya KS, Demark-Wahnefried W, Sami N, Lee K, Sweeney FC, et al. Aerobic and resistance exercise improves physical fitness, bone health, and quality of life in overweight and obese breast cancer survivors: A randomized controlled trial. *Breast Cancer Research*. 2018; 20: 1–10. <https://doi.org/10.1186/s13058-018-1051-6> PMID: 30340503
56. Galiano-Castillo N, Arroyo-Morales M, Lozano-Lozano M, Fernández-Lao C, Martín-Martín L, Del-Moral-Ávila R, et al. Effect of an Internet-based telehealth system on functional capacity and cognition in breast cancer survivors: a secondary analysis of a randomized controlled trial. *Supportive Care in Cancer*. 2017; 25: 3551–3559. <https://doi.org/10.1007/s00520-017-3782-9> PMID: 28639097
57. Gokal K, Wallis D, Ahmed S, Boiangiu I, Kancherla K, Munir F. Effects of a self-managed home-based walking intervention on psychosocial health outcomes for breast cancer patients receiving chemotherapy: a randomised controlled trial. *Supportive Care in Cancer*. 2016; 24: 1139–1166. <https://doi.org/10.1007/s00520-015-2884-5> PMID: 26275768
58. Grégoire C, Bragard I, Jerusalem G, Etienne AM, Coucke P, Dupuis G, et al. Group interventions to reduce emotional distress and fatigue in breast cancer patients: A 9-month follow-up pragmatic trial. *Br J Cancer*. 2017; 117: 1442–1449. <https://doi.org/10.1038/bjc.2017.326> PMID: 28926526
59. Huang HP, Wen FH, Yang TY, Lin YC, Tsai JC, Shun SC, et al. The effect of a 12-week home-based walking program on reducing fatigue in women with breast cancer undergoing chemotherapy: A randomized controlled study. *Int J Nurs Stud*. 2019; 99: 103376. <https://doi.org/10.1016/j.ijnurstu.2019.06.007> PMID: 31442785
60. Husebø AML, Dyrstad SM, Mjaaland I, Søreide JA, Bru E. Effects of scheduled exercise on cancer-related fatigue in women with early breast cancer. *The Scientific World Journal*. 2014; 2014. <https://doi.org/10.1155/2014/271828> PMID: 24563628
61. Jacot W, Arnaud A, Jarlier M, Lefevre-plesse C, Dalivoust P, Senesse P, et al. Brief hospital supervision of exercise and diet during adjuvant breast cancer therapy is not enough to relieve fatigue: A multicenter randomized controlled trial. *Nutrients*. 2020; 12: 1–24. <https://doi.org/10.3390/nu12103081> PMID: 33050321
62. Koch AK, Rabsilber S, Lauche R, Kümmel S, Dobos G, Langhorst J, et al. The effects of yoga and self-esteem on menopausal symptoms and quality of life in breast cancer survivors—A secondary analysis of a randomized controlled trial. *Maturitas*. 2017; 105: 95–99. <https://doi.org/10.1016/j.maturitas.2017.05.008> PMID: 28551083
63. Komatsu H, Yagasaki K, Yamauchi H, Yamauchi T, Takebayashi T. A self-directed home yoga programme for women with breast cancer during chemotherapy: A feasibility study. *Int J Nurs Pract*. 2016; 22: 258–266. <https://doi.org/10.1111/ijn.12419> PMID: 26643264
64. Loh SY, Lee SY, Murray L. The Kuala Lumpur Qigong Trial for Women in the Cancer Survivorship Phase-Efficacy of a Three-Arm RCT to Improve QOL. *Asian Pacific Journal of Cancer Prevention*. 2014; 15: 8127–8134. <https://doi.org/10.7314/apjcp.2014.15.19.8127> PMID: 25338995
65. Mijwel S, Jervaeus A, Bolam KA, Norrbom J, Bergh J, Rundqvist H, et al. High-intensity exercise during chemotherapy induces beneficial effects 12 months into breast cancer survivorship. *Journal of Cancer Survivorship*. 2019; 13: 244–256. <https://doi.org/10.1007/s11764-019-00747-z> PMID: 30912010

66. Mock V, Pickett M, Ropka ME, Lin EM, Stewart KJ, Rhodes VA, et al. Fatigue and quality of life outcomes of exercise during cancer treatment. *Cancer Pract*. 2001; 9: 119–127. <https://doi.org/10.1046/j.1523-5394.2001.009003119.x> PMID: 11879296
67. Mock V, Frangakis C, Davidson NE, Ropka ME, Pickett M, Poniatowski B, et al. Exercise manages fatigue during breast cancer treatment: A randomized controlled trial. *Psychooncology*. 2005; 14: 464–477. <https://doi.org/10.1002/pon.863> PMID: 15484202
68. Musanti R. Self-esteem in Breast Cancer Survivors. *Med Sci Sports Exerc*. 2012; 44: 352–362. <https://doi.org/10.1249/MSS.ObO>
69. Ochi E, Tsuji K, Narisawa T, Shimizu Y, Kuchiba A, Suto A, et al. Cardiorespiratory fitness in breast cancer survivors: a randomised controlled trial of home-based smartphone supported high intensity interval training. *BMJ Support Palliat Care*. 2022; 12: 33–37. <https://doi.org/10.1136/bmjspcare-2021-003141> PMID: 34389552
70. Payne JK, Held J, Thorpe J, Shaw H. Effect of exercise on biomarkers, fatigue, sleep disturbances, and depressive symptoms in older women with breast cancer receiving hormonal therapy. *Oncol Nurs Forum*. 2008; 35: 635–642. <https://doi.org/10.1188/08.ONF.635-642> PMID: 18591167
71. Pinto BM, Frierson GM, Rabin C, Trunzo JJ, Marcus BH. Home-based physical activity intervention for breast cancer patients. *Journal of Clinical Oncology*. 2005; 23: 3577–3587. <https://doi.org/10.1200/JCO.2005.03.080> PMID: 15908668
72. Pinto BM, Rabin C, Papandonatos GD, Frierson GM, Trunzo JJ, Marcus BH. Maintenance of effects of a home-based physical activity program among breast cancer survivors. *Supportive Care in Cancer*. 2008; 16: 1279–1289. <https://doi.org/10.1007/s00520-008-0434-0> PMID: 18414905
73. Porter LS, Carson JW, Olsen M, Carson KM, Sanders L, Jones L, et al. Feasibility of a mindful yoga program for women with metastatic breast cancer: results of a randomized pilot study. *Supportive Care in Cancer*. 2019; 27: 4307–4316. <https://doi.org/10.1007/s00520-019-04710-7> PMID: 30877596
74. Prieto-Gómez V, Yuste-Sánchez MJ, Bailón-Cerezo J, Romay-Barrero H, de la Rosa-Díaz I, Lirio-Romero C, et al. Effectiveness of Therapeutic Exercise and Patient Education on Cancer-Related Fatigue in Breast Cancer Survivors: A Randomised, Single-Blind, Controlled Trial with a 6-Month Follow-Up. *J Clin Med*. 2022; 11. <https://doi.org/10.3390/jcm11010269> PMID: 35012011
75. Qiao Y, van Londen GJ, Brufsky JW, Poppenberg JT, Cohen RW, Boudreau RM, et al. Perceived physical fatigability improves after an exercise intervention among breast cancer survivors: a randomized clinical trial. *Breast Cancer*. 2022; 29: 30–37. <https://doi.org/10.1007/s12282-021-01278-1> PMID: 34328623
76. Rogers LQ, Fogleman A, Trammell R, Hopkins-Price P, Vicari S, Rao K, et al. Effects of a Physical Activity Behavior Change Intervention on Inflammation and Related Health Outcomes in Breast Cancer Survivors. *Integr Cancer Ther*. 2013; 12: 323–335. <https://doi.org/10.1177/1534735412449687> PMID: 22831916
77. Schröder ML, Stöckigt B, Binting S, Tissen-Diabaté T, Bangemann N, Goerling U, et al. Feasibility and Possible Effects of Mindful Walking and Moderate Walking in Breast Cancer Survivors: A Randomized Controlled Pilot Study With a Nested Qualitative Study Part. *Integr Cancer Ther*. 2022; 21: 7–9. <https://doi.org/10.1177/15347354211066067> PMID: 35045736
78. Schwartz AL. Exercise and weight gain in breast cancer patients receiving chemotherapy. *Cancer Pract*. 2000; 8: 231–237. <https://doi.org/10.1046/j.1523-5394.2000.85007.x> PMID: 11898235
79. Schwartz AL. Daily fatigue patterns and effect of exercise in women with breast cancer. *Cancer Pract*. 2000; 8: 16–24. <https://doi.org/10.1046/j.1523-5394.2000.81003.x> PMID: 10732535
80. Schwartz AL, Mori M, Gao R, Nail LM, King ME. Exercise reduces daily fatigue in women with breast cancer receiving chemotherapy. *Med Sci Sports Exerc*. 2001; 33: 718–23. <https://doi.org/10.1097/00005768-200105000-00006> PMID: 11323538
81. Spector D, Deal AM, Amos KD, Yang H, Battaglini CL. A pilot study of a home-based motivational exercise program for African American breast cancer survivors: Clinical and quality-of-life outcomes. *Integr Cancer Ther*. 2014; 13: 121–132. <https://doi.org/10.1177/1534735413503546> PMID: 24105359
82. Stan DL, Croghan KA, Croghan IT, Jenkins SM, Sutherland SJ, Cheville AL, et al. Randomized pilot trial of yoga versus strengthening exercises in breast cancer survivors with cancer-related fatigue. *Supportive Care in Cancer*. 2016; 24: 4005–4015. <https://doi.org/10.1007/s00520-016-3233-z> PMID: 27129840
83. Van Waart H, Stuiver MM, Van Harten WH, Geleijn E, Kieffer JM, Buffart LM, et al. Effect of low-intensity physical activity and moderate- to high-intensity physical exercise during adjuvant chemotherapy on physical fitness, fatigue, and chemotherapy completion rates: Results of the PACES randomized clinical trial. *Journal of Clinical Oncology*. 2015; 33: 1918–1927. <https://doi.org/10.1200/JCO.2014.59.1081> PMID: 25918291

84. VanderWalde NA, Martin MY, Kocak M, Morningstar C, Deal AM, Nyrop KA, et al. Randomized phase II study of a home-based walking intervention for radiation-related fatigue among older patients with breast cancer. *J Geriatr Oncol*. 2021; 12: 227–234. <https://doi.org/10.1016/j.jgo.2020.09.013> PMID: 32978102
85. Vincent F, Labourey JL, Leobon S, Antonini MT, Lavau-Denes S, Tubiana-Mathieu N. Effects of a home-based walking training program on cardiorespiratory fitness in breast cancer patients receiving adjuvant chemotherapy: A pilot study. *Eur J Phys Rehabil Med*. 2013; 49: 319–329. PMID: 23480974
86. Vincent F, Deluche E, Bonis J, Leobon S, Antonini MT, Laval C, et al. Home-Based Physical Activity in Patients With Breast Cancer: During and/or After Chemotherapy? Impact on Cardiorespiratory Fitness. A 3-Arm Randomized Controlled Trial (APAC). *Integr Cancer Ther*. 2020; 19. <https://doi.org/10.1177/1534735420969818> PMID: 33228382
87. Winters-Stone KM, Moe EL, Perry CK, Medysky M, Pommier R, Vetto J, et al. Enhancing an oncologist's recommendation to exercise to manage fatigue levels in breast cancer patients: a randomized controlled trial. *Supportive Care in Cancer*. 2018; 26: 905–912. <https://doi.org/10.1007/s00520-017-3909-z> PMID: 28965138
88. Yang CY, Tsai JC, Huang YC, Lin CC. Effects of a home-based walking program on perceived symptom and mood status in postoperative breast cancer women receiving adjuvant chemotherapy. *J Adv Nurs*. 2011; 67: 158–168. <https://doi.org/10.1111/j.1365-2648.2010.05492.x> PMID: 20973811
89. Yuen HK, Sword D. Home-based exercise to alleviate fatigue and improve functional capacity among breast cancer survivors. *J Allied Health*. 2007; 36: 257–275. PMID: 19759996
90. Carayol M, Ninot G, Senesse P, Bleuse JP, Gourgou S, Sancho-Garnier H, et al. Short- and long-term impact of adapted physical activity and diet counseling during adjuvant breast cancer therapy: The “aPAD1” randomized controlled trial. *BMC Cancer*. 2019; 19: 1–20. <https://doi.org/10.1186/s12885-019-5896-6> PMID: 31345179
91. Chandwani KD, Perkins G, Nagendra HR, Raghuram N V., Spelman A, Nagarathna R, et al. Randomized, controlled trial of yoga in women with breast cancer undergoing radiotherapy. *Journal of Clinical Oncology*. 2014; 32: 1058–1065. <https://doi.org/10.1200/JCO.2012.48.2752> PMID: 24590636
92. Fillion L, Gagnon P, Leblond F, Duval K. A Brief Intervention for Fatigue. *Cancer Nurs*. 2008; 31: 145–159.
93. Leclerc AF, Slomian J, Jerusalem G, Coucke P, Bury T, Deflandre D, et al. Exercise and Education Program After Breast Cancer: Benefits on Quality of Life and Symptoms at 3, 6, 12, and 24 Months' Follow-up. *Clin Breast Cancer*. 2018; 18: e1189–e1204. <https://doi.org/10.1016/j.clbc.2018.05.004> PMID: 29880408
94. Lötze D, Wiedemann F, Rodrigues Recchia D, Ostermann T, Sattler D, Ettl J, et al. Iyengar-Yoga Compared to Exercise as a Therapeutic Intervention during (Neo)adjuvant Therapy in Women with Stage I-III Breast Cancer: Health-Related Quality of Life, Mindfulness, Spirituality, Life Satisfaction, and Cancer-Related Fatigue. *Evidence-based Complementary and Alternative Medicine*. 2016; 2016. <https://doi.org/10.1155/2016/5931816> PMID: 27019663
95. Sturgeon KM, Smith AM, Federici EH, Kodali N, Kessler R, Wyluda E, et al. Feasibility of a tailored home-based exercise intervention during neoadjuvant chemotherapy in breast cancer patients. *BMC Sports Sci Med Rehabil*. 2022; 14: 1–11. <https://doi.org/10.1186/s13102-022-00420-6> PMID: 35216638
96. Swenson KK, Nissen MJ, Anderson E, Shapiro A, Schouboe J, Leach J. Effects of exercise vs bisphosphonates on bone mineral density in breast cancer patients receiving chemotherapy. *Journal of Supportive Oncology*. 2009; 7: 101–107. PMID: 19507458
97. Carter SJ, Hunter GR, Norian LA, Turan B, Rogers LQ. Ease of walking associates with greater free-living physical activity and reduced depressive symptomology in breast cancer survivors: pilot randomized trial. *Support Care Cancer*. 2018; 26: 1675–1683. <https://doi.org/10.1007/s00520-017-4015-y> PMID: 29243165
98. Demark-Wahnefried W, Case LD, Blackwell K, Marcom PK, Kraus W, Aziz N, et al. Results of a diet/exercise feasibility trial to prevent adverse body composition change in breast cancer patients on adjuvant chemotherapy. *Clin Breast Cancer*. 2008; 8: 70–79. <https://doi.org/10.3816/CBC.2008.n.005> PMID: 18501061
99. DeNysschen CA, Brown JK, Cho MH, Dodd MJ. Nutritional symptom and body composition outcomes of aerobic exercise in women with breast cancer. *Clin Nurs Res*. 2011; 20: 29–46. <https://doi.org/10.1177/1054773810379402> PMID: 20736382
100. Harvie M, Pegington M, McMullan D, Bundred N, Livingstone K, Campbell A, et al. The effectiveness of home versus community-based weight control programmes initiated soon after breast cancer diagnosis: a randomised controlled trial. *Br J Cancer*. 2019; 121: 443–454. <https://doi.org/10.1038/s41416-019-0522-6> PMID: 31366999

101. Hughes DC, Leung P, Naus MJ. Using single-system analyses to assess the effectiveness of an exercise intervention on quality of life for hispanic breast cancer survivors: A pilot study. *Soc Work Health Care*. 2008; 47: 73–91. <https://doi.org/10.1080/00981380801970871> PMID: 18956514
102. Kim SH, Cho YU, Kim SJ, Hong S, Han MS, Choi E. The effect on bone outcomes of adding exercise to supplements for osteopenic breast cancer survivors: A pilot randomized controlled trial. *Cancer Nurs*. 2016; 39: 144–152. <https://doi.org/10.1097/NCC.0000000000000245> PMID: 25730596
103. Kim M, Lee M, Kim M, Oh S, Jung SP, Yoon B. Effectiveness of therapeutic inflatable ball self-exercises for improving shoulder function and quality of life in breast cancer survivors after sentinel lymph node dissection. *Supportive Care in Cancer*. 2019. <https://doi.org/10.1007/s00520-019-4656-0> PMID: 30874927
104. Knopf MT, Jeon S, Smith B, Harris L, Kerstetter J, Thompson AS, et al. Effect of a randomized controlled exercise trial on bone outcomes: influence of adjuvant endocrine therapy. *Breast Cancer Res Treat*. 2016; 155: 491–500. <https://doi.org/10.1007/s10549-016-3693-3> PMID: 26850265
105. Lahart IM, Metsios GS, Nevill AM, Kitas GD, Carmichael AR. Randomised controlled trial of a home-based physical activity intervention in breast cancer survivors. *BMC Cancer*. 2016; 16: 1–14. <https://doi.org/10.1186/s12885-016-2258-5> PMID: 26988367
106. Ligibel JA, Partridge A, Giobbie-Hurder A, Campbell N, Shockro L, Salinadri T, et al. Physical and psychological outcomes among women in a telephone-based exercise intervention during adjuvant therapy for early stage breast cancer. *J Womens Health*. 2010; 19: 1553–1559. <https://doi.org/10.1089/jwh.2009.1760> PMID: 20629579
107. Mascherini G, Tosi B, Giannelli C, Grifoni E, Degl'Innocenti S, Galanti G. Breast cancer: Effectiveness of a one-year unsupervised exercise program. *Journal of Sports Medicine and Physical Fitness*. 2019; 283–289. <https://doi.org/10.23736/S0022-4707.18.08131-8> PMID: 29498250
108. Mascherini G, Tosi B, Giannelli C, Ermini E, Osti L, Galanti G. Adjuvant therapy reduces fat mass loss during exercise prescription in breast cancer survivors. *J Funct Morphol Kinesiol*. 2020; 5: 1–10. <https://doi.org/10.3390/jfmk5030049> PMID: 33467265
109. Matthews CE, Wilcox S, Hanby CL, Der Ananian C, Heiney SP, Gebretsadik T, et al. Evaluation of a 12-week home-based walking intervention for breast cancer survivors. *Supportive Care in Cancer*. 2007; 15: 203–211. <https://doi.org/10.1007/s00520-006-0122-x> PMID: 17001492
110. McNeil J, Brenner DR, Stone CR, O'Reilly R, Ruan Y, Vallance JK, et al. Activity Tracker to Prescribe Various Exercise Intensities in Breast Cancer Survivors. *Med Sci Sports Exerc*. 2019; 51: 930–940. <https://doi.org/10.1249/MSS.0000000000001890> PMID: 30694978
111. Møller T, Andersen C, Lillélund C, Bloomquist K, Christensen KB, Ejlersen B, et al. Physical deterioration and adaptive recovery in physically inactive breast cancer patients during adjuvant chemotherapy: a randomised controlled trial. *Sci Rep*. 2020; 10: 1–15. <https://doi.org/10.1038/s41598-020-66513-9> PMID: 32546796
112. Waltman NL, Twiss JJ, Ott CD, Gross GJ, Lindsey AM, Moore TE, et al. Testing an intervention for preventing osteoporosis in postmenopausal breast cancer survivors. *Journal of Nursing Scholarship*. 2003; 35: 333–338. <https://doi.org/10.1111/j.1547-5069.2003.00333.x> PMID: 14735675
113. Westphal T, Rinnerthaler G, Gampenrieder SP, Niebauer J, Thaler J, Pfob M, et al. Supervised versus autonomous exercise training in breast cancer patients: A multicenter randomized clinical trial. *Cancer Med*. 2018; 7: 5962–5972. <https://doi.org/10.1002/cam4.1851> PMID: 30415507
114. Winters-Stone KM, Torgrimson-Ojerio B, Dieckmann NF, Stoyles S, Mitri Z, Luoh SW. A randomized-controlled trial comparing supervised aerobic training to resistance training followed by unsupervised exercise on physical functioning in older breast cancer survivors. *J Geriatr Oncol*. 2022; 13: 152–160. <https://doi.org/10.1016/j.jgo.2021.08.003> PMID: 34426142
115. Xu L, Zhou C, Ling Y, Ding H, Wang Q, Wu Y, et al. Effects of Short-Term Unsupervised Exercise, Based on Smart Bracelet Monitoring, on Body Composition in Patients Recovering from Breast Cancer. *Integr Cancer Ther*. 2021; 20. <https://doi.org/10.1177/15347354211040780> PMID: 34467791
116. Lahart IM, Carmichael AR, Nevill AM, Kitas GD, Metsios GS. The effects of a home-based physical activity intervention on cardiorespiratory fitness in breast cancer survivors; a randomised controlled trial. *J Sports Sci*. 2018; 36: 1077–1086. <https://doi.org/10.1080/02640414.2017.1356025> PMID: 28745131
117. Ammitzbøll G, Andersen KG, Bidstrup PE, Johansen C, Lanng C, Kroman N, et al. Effect of progressive resistance training on persistent pain after axillary dissection in breast cancer: a randomized controlled trial. *Breast Cancer Res Treat*. 2020; 179: 173–183. <https://doi.org/10.1007/s10549-019-05461-z> PMID: 31605312
118. Wonders KY, Whisler G, Loy H, Holt B, Bohachek K, Wise R. Ten weeks of home-based exercise attenuates symptoms of chemotherapy-induced peripheral neuropathy in breast cancer patients. *Health Psychol Res*. 2013; 1: 28. <https://doi.org/10.4081/hpr.2013.e28> PMID: 26973913

119. Ammitzbøll G, Kristina Kjær T, Johansen C, Lanng C, Wreford Andersen E, Kroman N, et al. Effect of progressive resistance training on health-related quality of life in the first year after breast cancer surgery—results from a randomized controlled trial. *Acta Oncol (Madr)*. 2019; 58: 665–672. <https://doi.org/10.1080/0284186X.2018.1563718> PMID: 30702006
120. Basen-Engquist KM, Raber M, Carmack CL, Arun B, Brewster AM, Fingeret M, et al. Feasibility and efficacy of a weight gain prevention intervention for breast cancer patients receiving neoadjuvant chemotherapy: a randomized controlled pilot study. *Supportive Care in Cancer*. 2020; 28: 5821–5832. <https://doi.org/10.1007/s00520-020-05411-2> PMID: 32249355
121. Courneya KS, Segal RJ, Gelmon K, Reid RD, Mackey JR, Friedenreich CM, et al. Six-month follow-up of patient-rated outcomes in a randomized controlled trial of exercise training during breast cancer chemotherapy. *Cancer Epidemiology Biomarkers and Prevention*. 2007; 16: 2572–2578. <https://doi.org/10.1158/1055-9965.EPI-07-0413> PMID: 18086760
122. Demark-Wahnefried W, Colditz GA, Rock CL, Sedjo RL, Liu J, Wolin KY, et al. Quality of life outcomes from the Exercise and Nutrition Enhance Recovery and Good Health for You (ENERGY)-randomized weight loss trial among breast cancer survivors. *Breast Cancer Res Treat*. 2015; 154: 329–337. <https://doi.org/10.1007/s10549-015-3627-5> PMID: 26518022
123. Rogers LQ, Courneya KS, Anton PM, Hopkins-Price P, Verhulst S, Vicari SK, et al. Effects of the BEAT Cancer physical activity behavior change intervention on physical activity, aerobic fitness, and quality of life in breast cancer survivors: a multicenter randomized controlled trial. *Breast Cancer Res Treat*. 2015; 149: 109–119. <https://doi.org/10.1007/s10549-014-3216-z> PMID: 25417174
124. Galiano-Castillo N, Cantarero-Villanueva I, Fernández-Lao C, Ariza-García A, Díaz-Rodríguez L, Del-Moral-Ávila R, et al. Telehealth system: A randomized controlled trial evaluating the impact of an internet-based exercise intervention on quality of life, pain, muscle strength, and fatigue in breast cancer survivors. *Cancer*. 2016; 122: 3166–3174. <https://doi.org/10.1002/cncr.30172> PMID: 27332968
125. Tralongo P, Pescarenico AG, Surbone A, Bordonaro S, Berretta M, Di Mari A. Physical needs of long-term cancer patients. *Anticancer Res*. 2017; 37: 4733–4746. <https://doi.org/10.21873/anticancer.11880> PMID: 28870892
126. Kessels E, Husson O, van der Feltz-Cornelis CM. The effect of exercise on cancer-related fatigue in cancer survivors: A systematic review and meta-analysis. *Neuropsychiatr Dis Treat*. 2018; 14: 479–494. <https://doi.org/10.2147/NDT.S150464> PMID: 29445285
127. Wong JN, McAuley E, Trinh L. Physical activity programming and counseling preferences among cancer survivors: A systematic review. *International Journal of Behavioral Nutrition and Physical Activity*. 2018; 15. <https://doi.org/10.1186/s12966-018-0680-6> PMID: 29879993
128. Pekmezi D, Martin MY, Kvale E, Meneses K, Demark-Wahnefried W. Enhancing Exercise Adherence for the Breast Cancer Survivors. *ACSMs Health Fit J*. 2012; 16: 8–13. <https://doi.org/10.1249/FIT.0b013e31825a6db6> PMID: 23275740
129. Rock CL, Doyle C, Demark-Wahnefried W, Meyerhardt J, Courneya KS, Schwartz AL, et al. Nutrition and physical activity guidelines for cancer survivors. *CA Cancer J Clin*. 2012; 62: 242–274. <https://doi.org/10.3322/caac.21142> PMID: 22539238
130. Schmitz KH, Courneya KS, Matthews C, Demark-Wahnefried W, Galvão DA, Pinto BM, et al. American college of sports medicine roundtable on exercise guidelines for cancer survivors. *Med Sci Sports Exerc*. 2010; 42: 1409–1426. <https://doi.org/10.1249/MSS.0b013e3181e0c112> PMID: 20559064
131. Campbell KL, Winters-Stone KM, Wiskemann J, May AM, Schwartz AL, Courneya KS, et al. Exercise Guidelines for Cancer Survivors: Consensus Statement from International Multidisciplinary Roundtable. *Med Sci Sports Exerc*. 2019; 51: 2375–2390. <https://doi.org/10.1249/MSS.0000000000002116> PMID: 31626055
132. Shao J, Rodrigues M, Corter AL, Baxter NN. Multidisciplinary care of breast cancer patients: A scoping review of multidisciplinary styles, processes, and outcomes. *Current Oncology*. 2019; 26: e385–e397. <https://doi.org/10.3747/co.26.4713> PMID: 31285683
133. Hollingworth J, Walsh L, Tran S, Ramage L, Patel-Brown S, Ambekar M, et al. Does a multidisciplinary menopausal symptoms after cancer clinic reduce symptoms? *Supportive Care in Cancer*. 2022; 30: 2245–2252. <https://doi.org/10.1007/s00520-021-06637-4> PMID: 34714415
134. Cohen PA, Brennan A, Marino JL, Saunders CM, Hickey M. Managing menopausal symptoms after breast cancer—A multidisciplinary approach. *Maturitas*. Elsevier Ireland Ltd; 2017. pp. 4–7. <https://doi.org/10.1016/j.maturitas.2017.04.013> PMID: 28473176
135. Khan F, Amatya B, Ng L, Demetrios M, Zhang NY, Turner-Stokes L. Multidisciplinary rehabilitation for follow-up of women treated for breast cancer. *Cochrane Database of Systematic Reviews*. John Wiley and Sons Ltd; 2012. <https://doi.org/10.1002/14651858.CD009553.pub2> PMID: 23235677

136. Leclerc AF, Jerusalem G, Devos M, Crielaard JM, Maquet D. Multidisciplinary management of breast cancer. *Archives of Public Health*. BioMed Central Ltd.; 2016. <https://doi.org/10.1186/s13690-016-0163-7> PMID: 27980734
137. Kudre D, Chen Z, Richard A, Cabaset S, Dehler A, Schmid M, et al. Multidisciplinary Outpatient Cancer Rehabilitation Can Improve Cancer Patients' Physical and Psychosocial Status-a Systematic Review. *Curr Oncol Rep*. 2020. <https://doi.org/10.1007/s11912-020-00979-8> PMID: 33001322
138. Fiona W, Oloruntobi R, Roberto LC, Tarannum R. The feasibility and effects of a telehealth-delivered home-based prehabilitation program for cancer patients during the pandemic. *Current Oncology*. 2021; 28: 2248–2259. <https://doi.org/10.3390/curroncol28030207> PMID: 34204531
139. Tollosa DN, Holliday E, Hure A, Tavener M, James EL. Multiple health behaviors before and after a cancer diagnosis among women: A repeated cross-sectional analysis over 15 years. *Cancer Med*. 2020; 9: 3224–3233. <https://doi.org/10.1002/cam4.2924> PMID: 32134568
140. Cramer H, Lauche R, Klose P, Lange S, Langhorst J, Dobos GJ. Yoga for improving health-related quality of life, mental health and cancer-related symptoms in women diagnosed with breast cancer. *Cochrane Database of Systematic Reviews*. 2017;2017. <https://doi.org/10.1002/14651858.CD010802.pub2> PMID: 28045199
141. Nelson NL. Breast Cancer–Related Lymphedema and Resistance Exercise: A Systematic Review. *J Strength Cond Res*. 2016; 30: 2656–2665. <https://doi.org/10.1519/JSC.0000000000001355> PMID: 26840439
142. Pollack AH, Backonja U, Miller AD, Mishra SR, Khelifi M, Kendall L, et al. Closing the Gap: Supporting Patients' Transition to Self- Management after Hospitalization. *Proceedings of the 2016 CHI Conference on Human Factors in Computing Systems*. New York, NY, USA: ACM; 2016. pp. 5324–5336. doi:10.1145/2858036.2858240
